# Supplementary material for: Switchable Lipid Provides pH-Sensitive Properties to Lipid and Hybrid Polymer/Lipid Membranes
Source: MDPI journal article supplement (doi:10.3390/polym12030637), 2020-03-11
Supplement: s1 [file s1]

# Supplementary information

## Switchable lipid provides pH-sensitive properties to lipid and hybrid polymer/lipid membranes

Victor Passos Gibson <sup>1</sup>, Martin Fauquignon <sup>2</sup>, Emmanuel Ibarboure <sup>2</sup>, Jeanne Leblond Chain <sup>1,3,\*</sup> and Jean-François Le Meins <sup>2,\*</sup>

<sup>1</sup> Gene Delivery Laboratory, Faculty of pharmacy, University of Montréal, Montréal, QC, Canada; victor.passos.gibson@umontreal.ca

<sup>2</sup> Laboratoire de Chimie des Polymères Organiques LCPO Université de Bordeaux CNRS Bordeaux INP UMR 562916 Avenue Pey Berland F-33600 Pessac France; lemeins@enscbp.fr

<sup>3</sup> ARNA Laboratory, INSERM U1212, CNRS UMR 5320, University of Bordeaux, Faculty of pharmacy, F-33016 Bordeaux, France. Jeanne.leblond-chain@inserm.fr.

\* Correspondence: Jeanne.leblond-chain@inserm.fr; lemeins@enscbp.fr

### Content

**Figure S1 :** <sup>1</sup>H NMR of GUV-CSL 20% in CDCl<sub>3</sub>

**Figure S2 :** <sup>1</sup>H NMR GUV-CSL 50% in CDCl<sub>3</sub>

**Figure S3 :** <sup>1</sup>H NMR GHUV-CSL 20% in CDCl<sub>3</sub>

**Figure S4 :** <sup>1</sup>H NMR GHUV-CSL 50% in CDCl<sub>3</sub>

**Figure S5:** Size distribution and correlogram fit of LUV and LHUV at pH 6.8 and 2.8

**Table S1.** Physico-chemical properties of LUVs and LHUVs before and after treatment with HCl or NaCl.

**Figure S6.** Morphological changes of GUVs upon HCl or NaCl treatment.

**Figure S7.** Snapshots of morphological changes in GUV-CSL 50% treated with HCl.

**Figure S8.** Morphological changes of GHUVs upon HCl treatment.

**Figure S9.** Snapshots of morphological changes in GHUV-CSL 20% treated with HCl.

**Figure S10.** Permeability of calcein-loaded GUV-POPC 50% treated with HCl.

**Figure S11.** Calcein-loaded GUV-CSL 50% treated with HCl.

**Figure S12.** Calcein-loaded GHUV-CSL 50% treated with HCl.

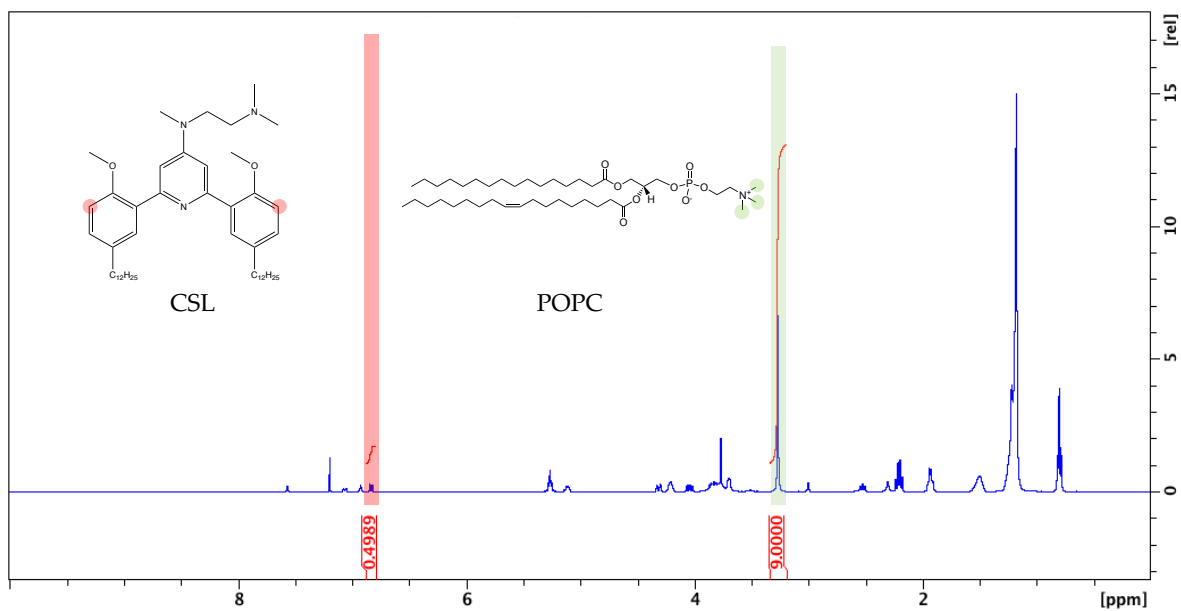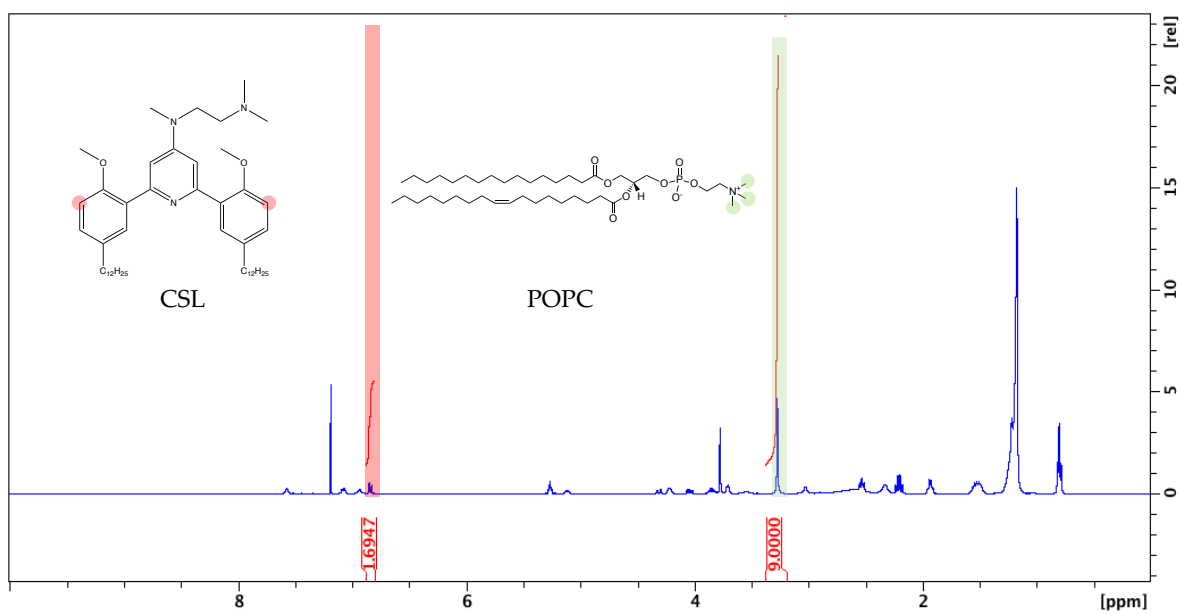

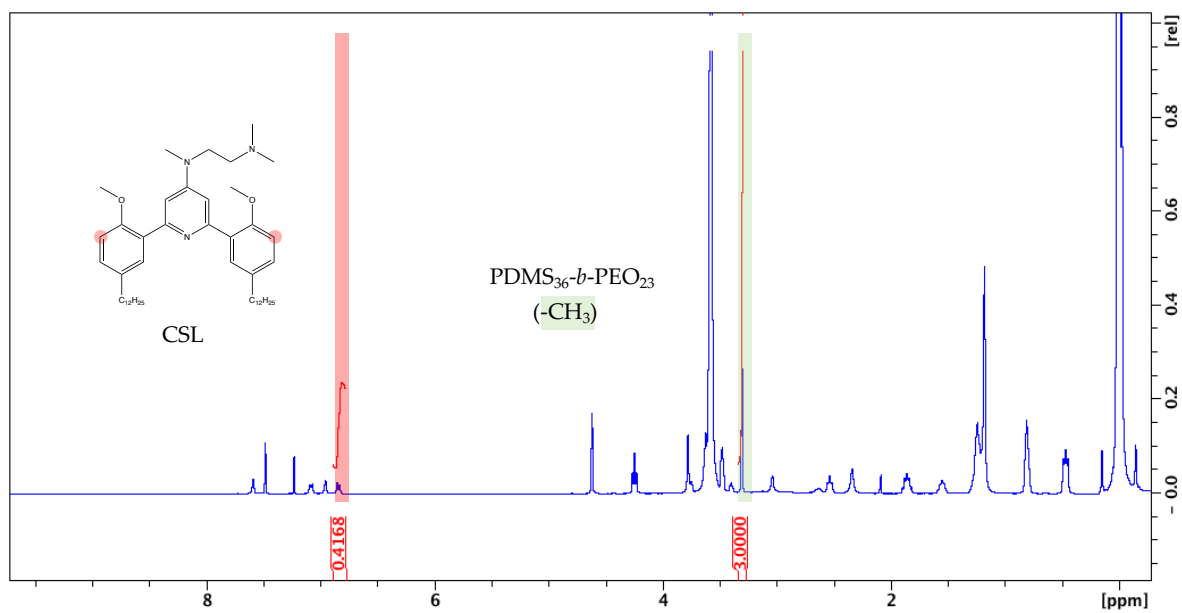

**Figure S3.**  $^1\text{H}$  NMR spectrum of GHUV-CSL 20% in  $\text{CDCl}_3$

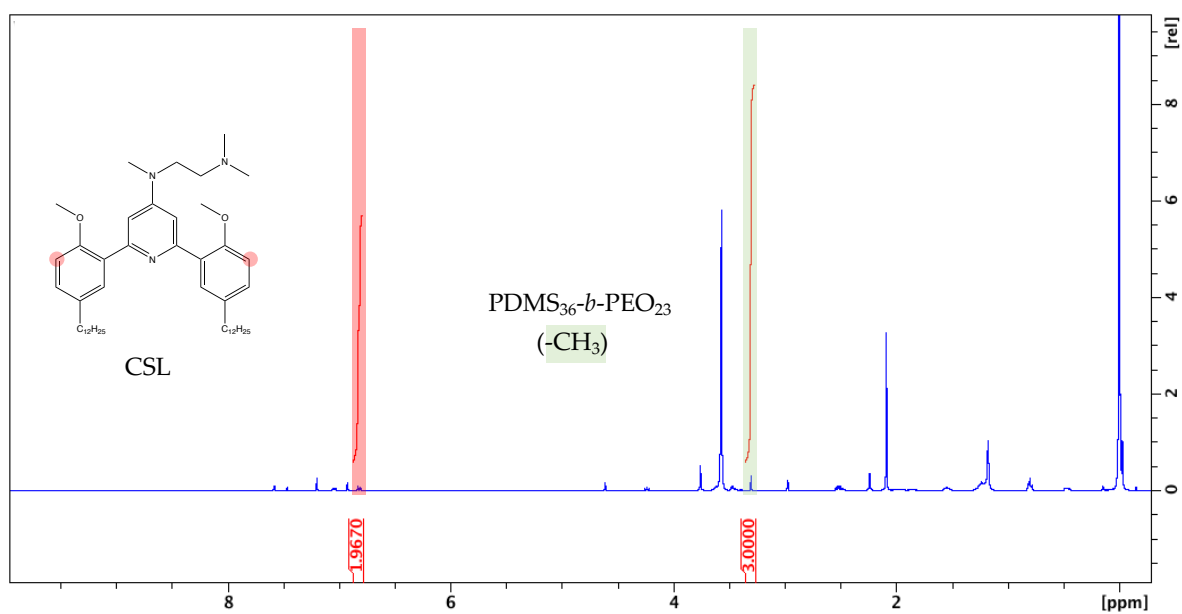

**Figure S4.**  $^1\text{H}$  NMR spectrum of GHUV-CSL 50% in  $\text{CDCl}_3$

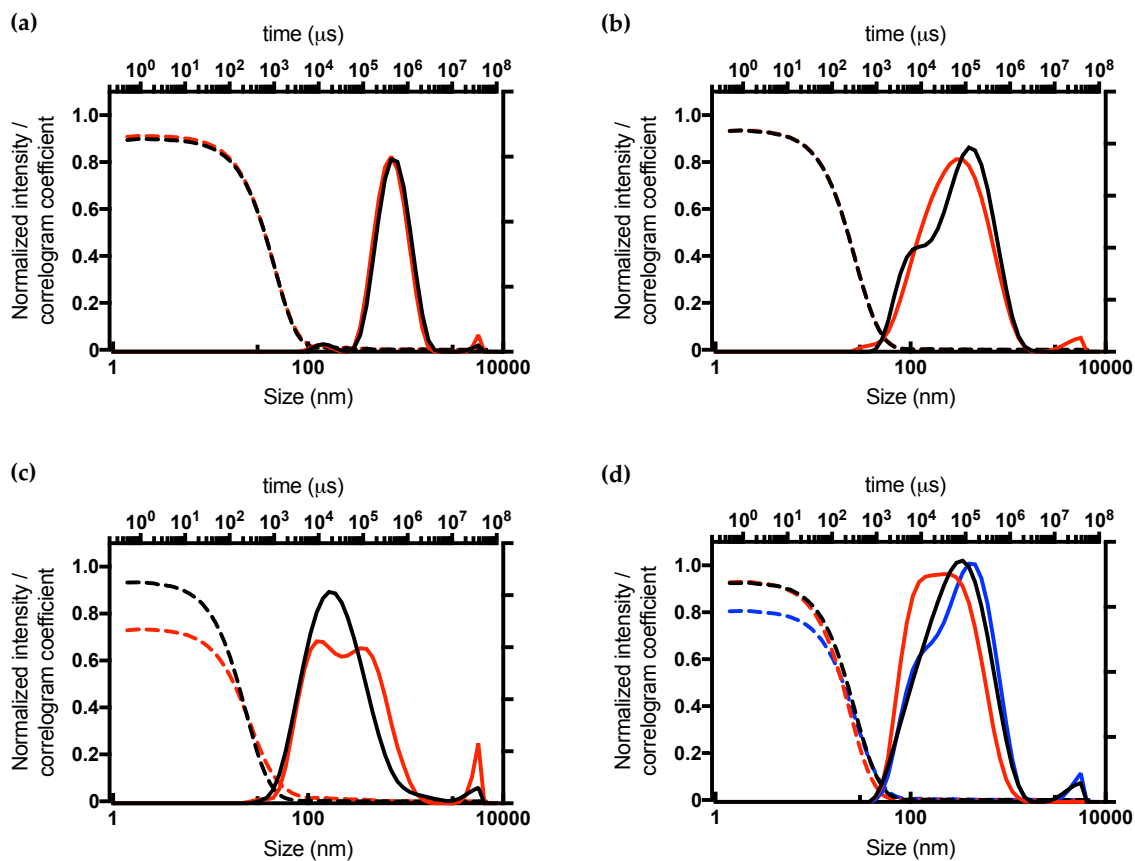

**Figure S5.** Size distribution and correlogram fit of LUV and LHUV at pH 6.8 and 2.8. (a) LUV-POPC, (b) LHUV-POPC 20%, (c) LHUV-POPC 50%, (d) LHUV-CSL 20%. Black line: pH 6.8; red line: pH 2.8; blue line: NaCl.

**Table S1.** Physico-chemical properties of LUVs and LHUVs before and after treatment with HCl or NaCl.

| Name      | Composition<br>(% mol)                                           | Hydrodynamic diameter (nm) |                    |                 | DCR<br>(Derived count rate)                      |                                                   |                                                  |
|-----------|------------------------------------------------------------------|----------------------------|--------------------|-----------------|--------------------------------------------------|---------------------------------------------------|--------------------------------------------------|
|           |                                                                  | pH 6.8                     | pH 2.8             | NaCl            | pH 6.8                                           | pH 2.8                                            | NaCl                                             |
| LUV-POPC  | n/a                                                              | 687 ± 6<br>(0.254)         | 657 ± 9<br>(0.336) | ND <sup>1</sup> | 1.0 × 10 <sup>5</sup><br>± 0.6 × 10 <sup>3</sup> | 0.9 × 10 <sup>5</sup> ±<br>0.4 × 10 <sup>3</sup>  | ND                                               |
| LUV-CSL   | POPC:CSL 50:50                                                   | 245 ± 3<br>(0.338)         | 126 ± 1<br>(0.243) | ND              | 2.4 × 10 <sup>5</sup> ±<br>1.3 × 10 <sup>3</sup> | 1.2 × 10 <sup>5</sup> ±<br>0.2 × 10 <sup>3</sup>  | ND                                               |
| LHUV-POPC | PDMS <sub>36</sub> - <i>b</i> -PEO <sub>23</sub> :<br>POPC 80:20 | 234 ± 1<br>(0.339)         | 232 ± 3<br>(0.360) | ND              | 6.1 × 10 <sup>4</sup><br>± 0.2 × 10 <sup>3</sup> | 6.1 × 10 <sup>4</sup> ±<br>0.1 × 10 <sup>3</sup>  | ND                                               |
|           | PDMS <sub>36</sub> - <i>b</i> -PEO <sub>23</sub> :<br>POPC 50:50 | 165 ± 2<br>(0.291)         | 216 ± 1<br>(0.514) | ND              | 4.5 × 10 <sup>4</sup><br>± 0.1 × 10 <sup>3</sup> | 4.8 × 10 <sup>4</sup> ±<br>3.7 × 10 <sup>3</sup>  | ND                                               |
| LHUV-CSL  | PDMS <sub>36</sub> - <i>b</i> -PEO <sub>23</sub> :<br>CSL 80:20  | 228 ± 2<br>(0.354)         | 177 ± 1<br>(0.250) | 242 ± 8         | 6.4 × 10 <sup>4</sup><br>± 1.0 × 10 <sup>3</sup> | 6.1 × 10 <sup>4</sup> ±<br>0.07 × 10 <sup>3</sup> | 6.7 × 10 <sup>4</sup> ±<br>2.2 × 10 <sup>3</sup> |
|           | PDMS <sub>36</sub> - <i>b</i> -PEO <sub>23</sub> :<br>CSL 50:50  | 320 ± 1<br>(0.340)         | 183 ± 1<br>(0.297) | 312 ± 10        | 8.4 × 10 <sup>4</sup><br>± 0.8 × 10 <sup>3</sup> | 6.3 × 10 <sup>4</sup> ±<br>0.3 × 10 <sup>3</sup>  | 9.0 × 10 <sup>4</sup> ±<br>0.5 × 10 <sup>3</sup> |

<sup>1</sup>Not determined

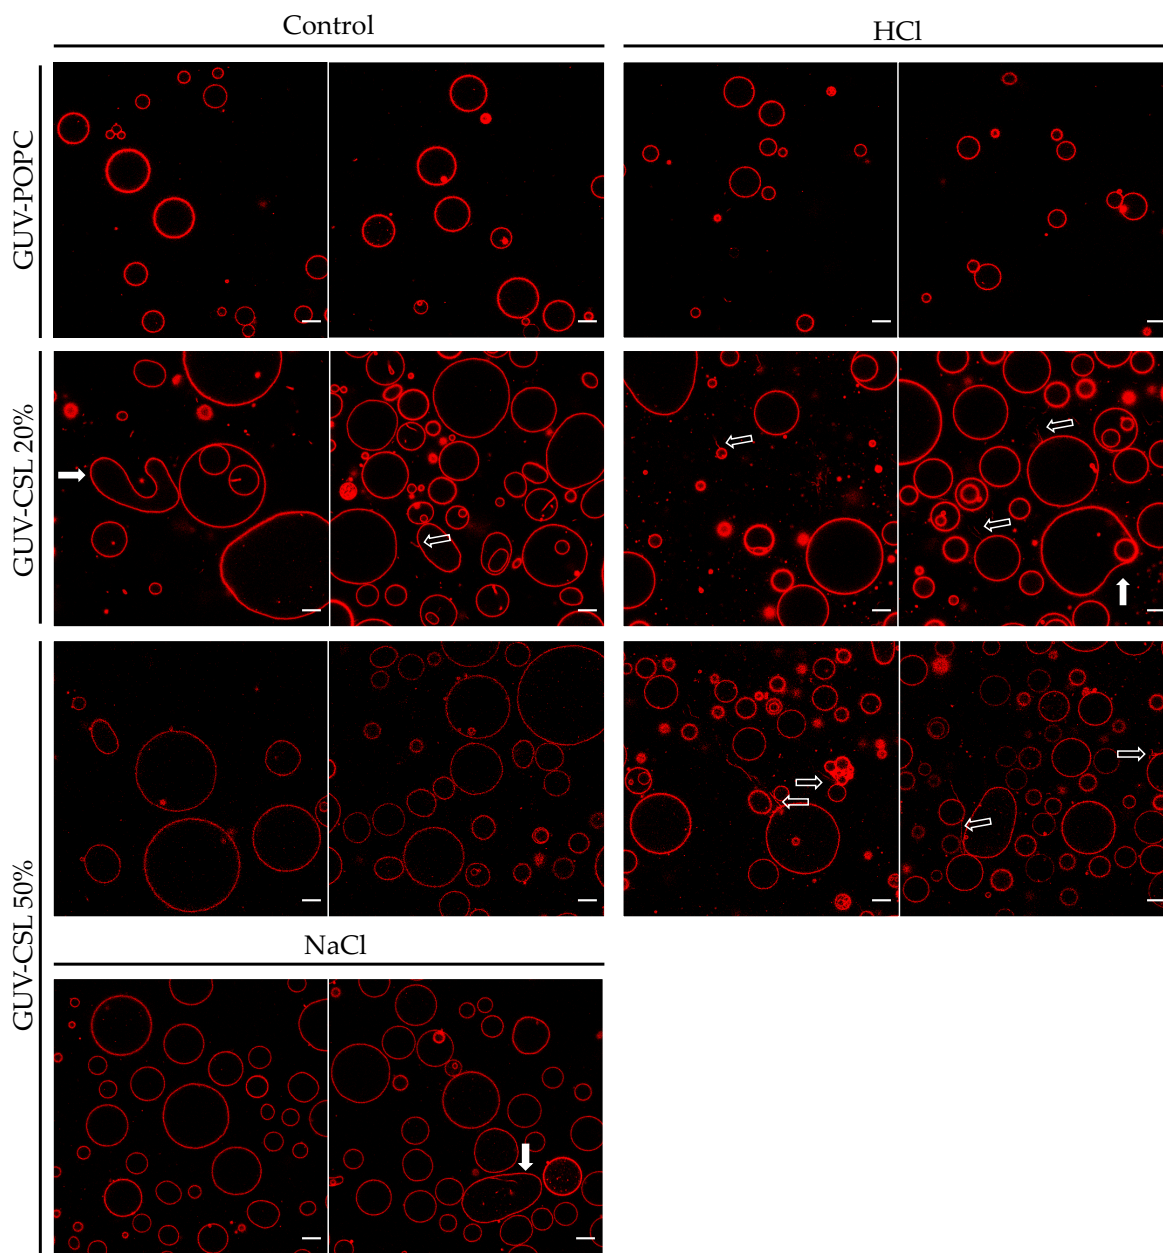

**Figure S6.** Morphological changes of GUVs upon HCl or NaCl treatment. Open arrows: vesicles with outward projections. Full arrows: membrane fluctuation events. Scale bar: 10  $\mu\text{m}$ .

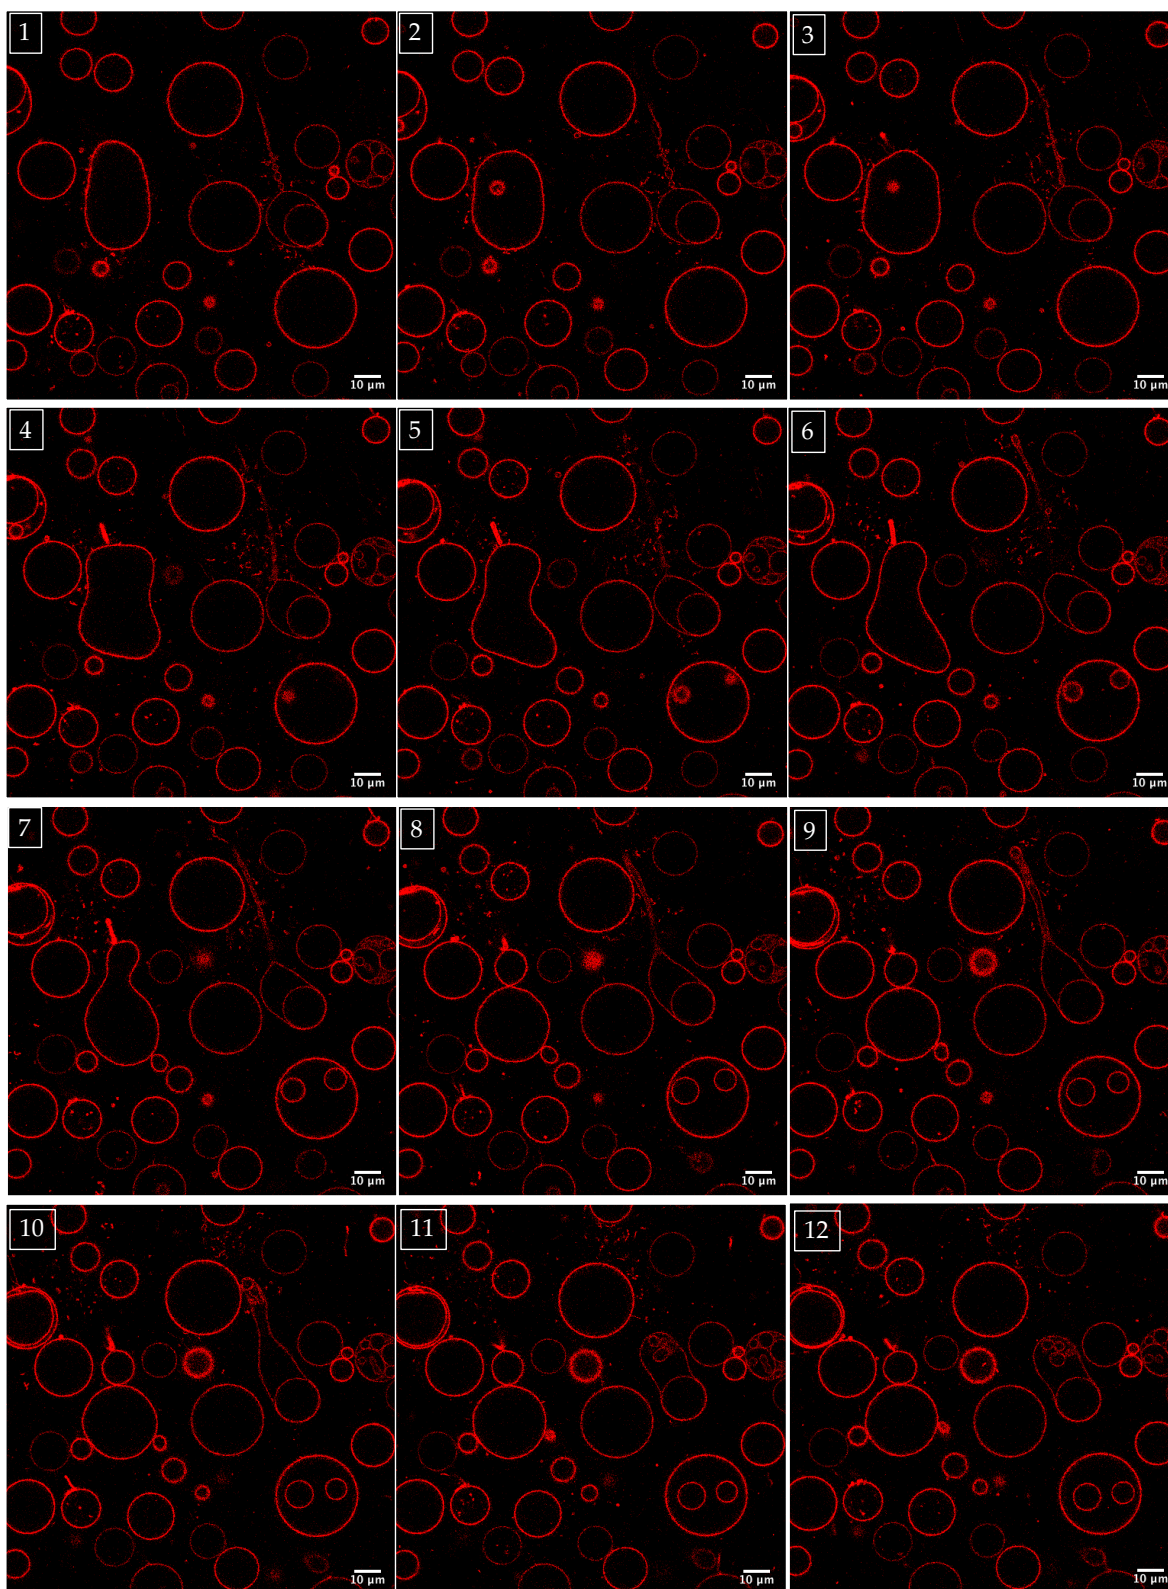

**Figure S7.** Snapshots of morphological changes in GUV-CSL 50% treated with HCl. White boxes in the upper left corner indicate frame order. Time-lapse between pictures is 0.143 second; total time-lapse is 1.86 seconds. Scale bar: 10  $\mu\text{m}$ .

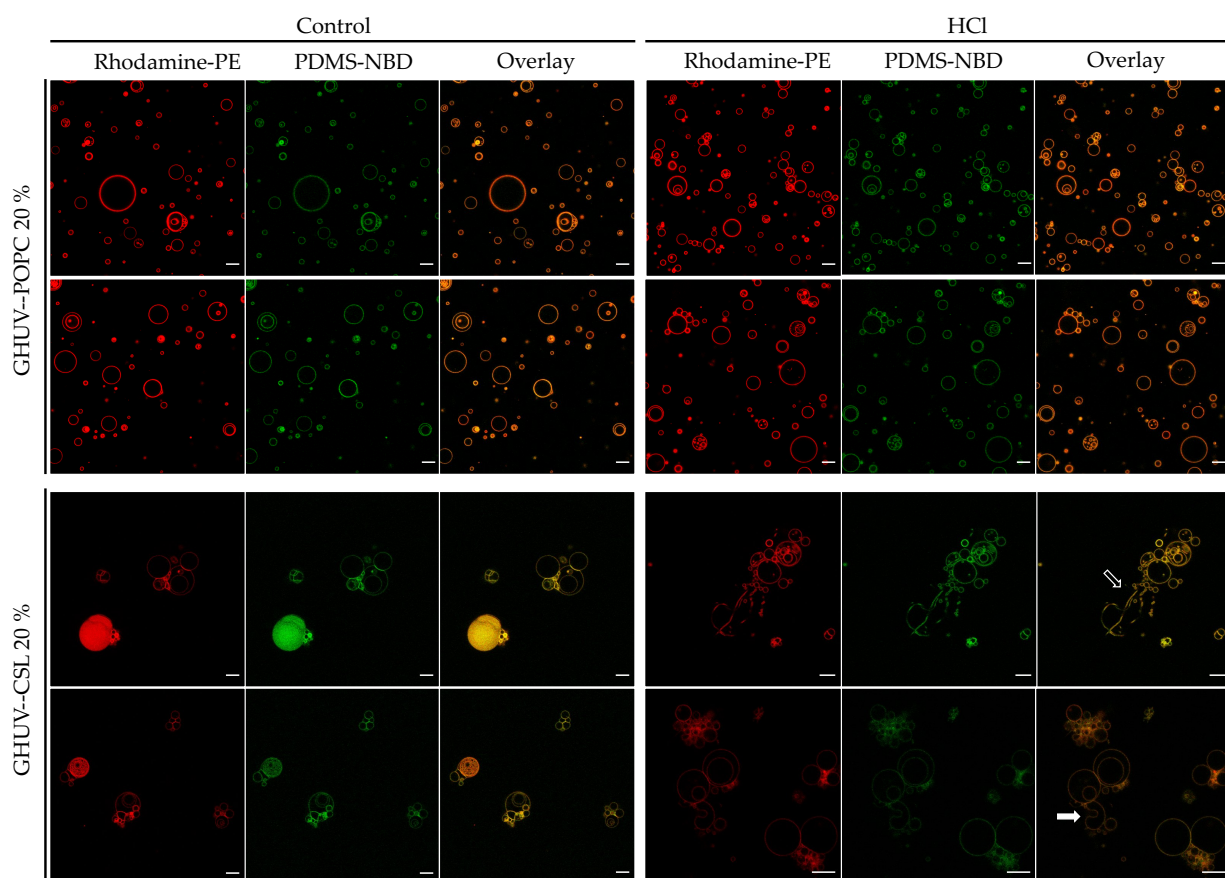

**Figure S8.** Morphological changes of GHUVs upon HCl treatment. Open arrows: vesicles with outward projections. Full arrows: membrane fluctuation events. Scale bar: 10  $\mu\text{m}$ .

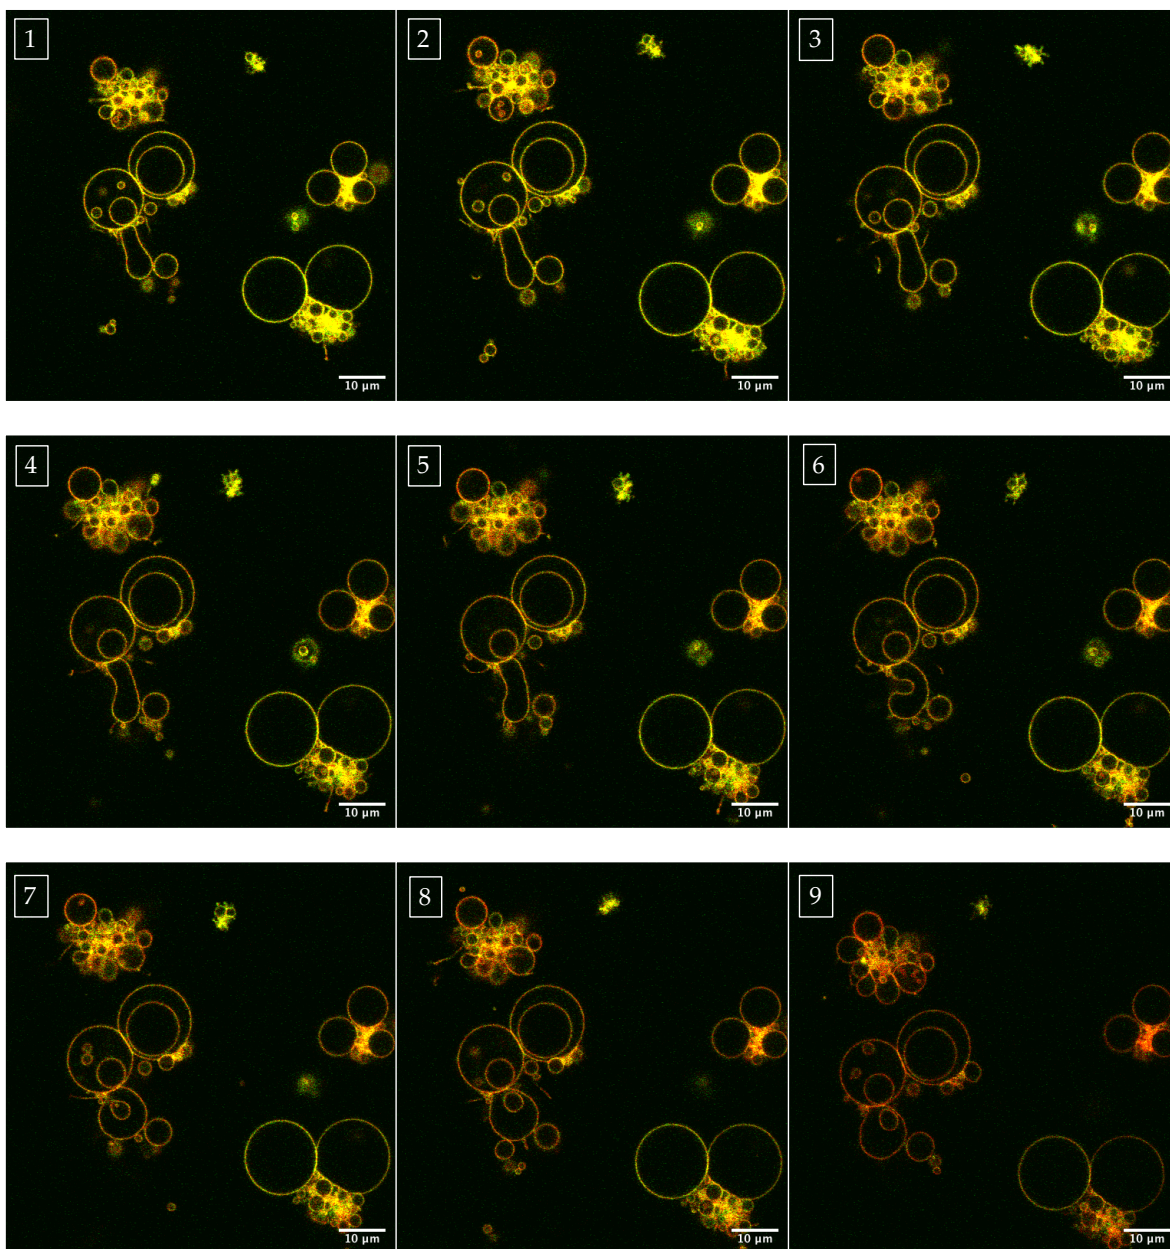

**Figure S9.** Snapshots of morphological changes in GHUV-CSL 20% treated with HCl. Merged PDMS-NBD and Rhodamine-PE filters. Time-lapse between pictures is 0.694 second; total time-lapse is 6.25 seconds. Scale bar: 10  $\mu\text{m}$ .

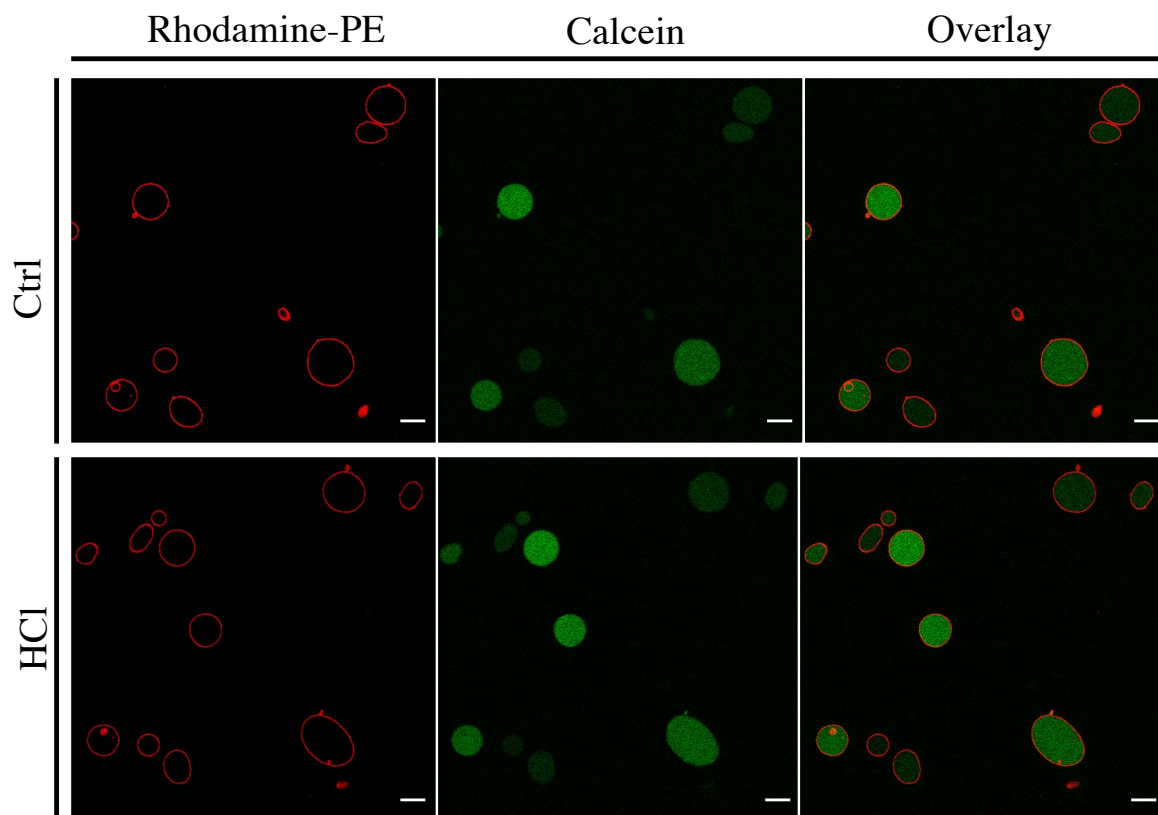

**Figure S10.** Permeability of calcein-loaded GUV-POPC 50% treated with HCl. Snapshots of morphological changes in GUV-POPC 50% treated with HCl. Rhodamine, calcein and merged filters. Scale bar: 10  $\mu\text{m}$

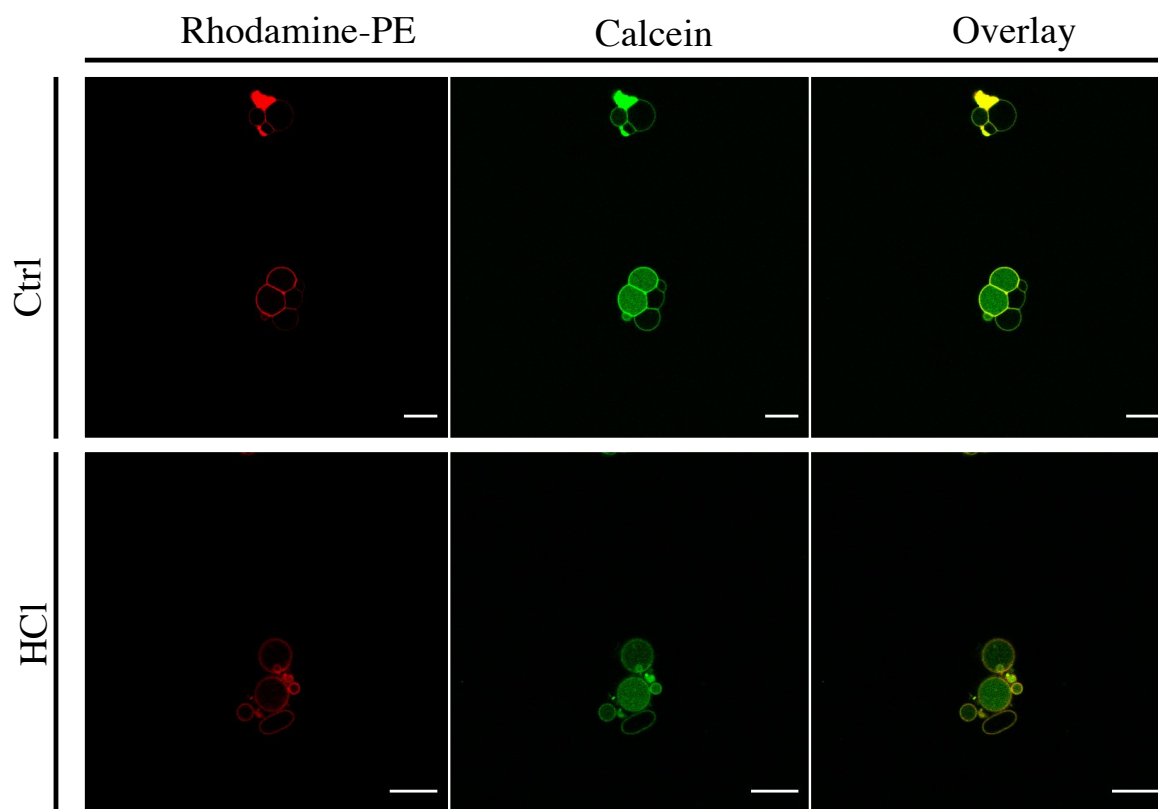

**Figure S11.** Calcein-loaded GUV-CSL 50% treated with HCl. Rhodamine, calcein and merged filters. Scale bar: 10  $\mu\text{m}$

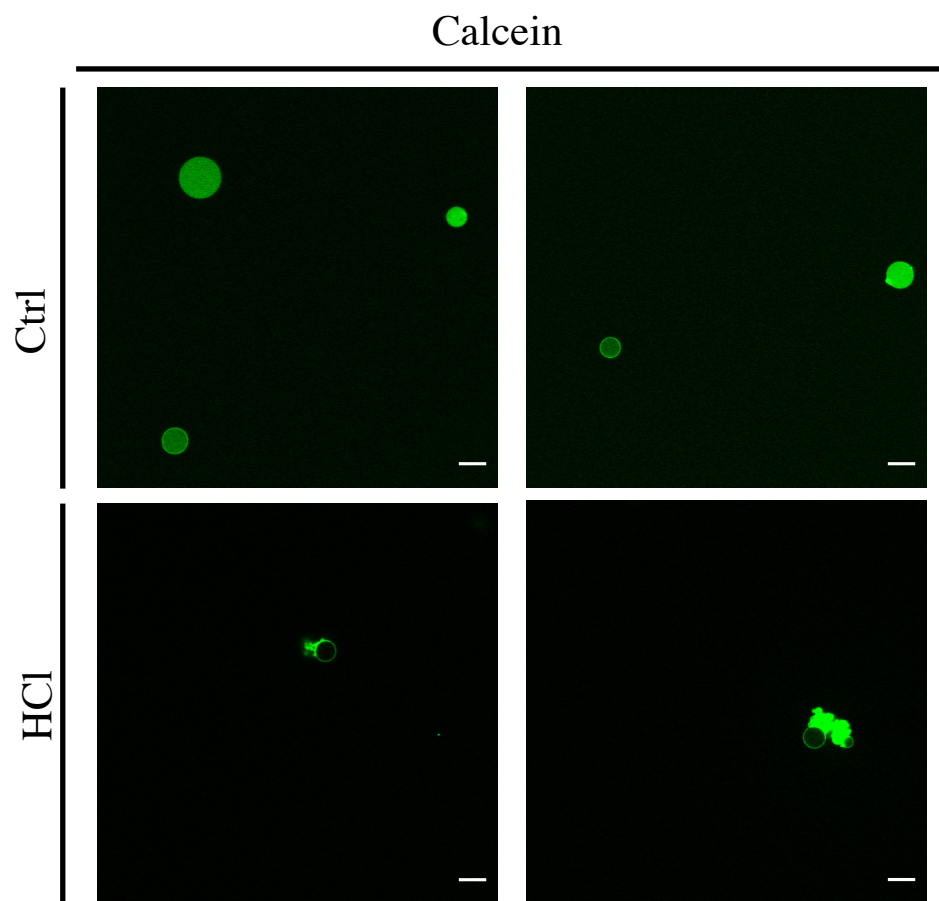

**Figure S12.** Calcein-loaded GHUV-CSL 50% treated with HCl. Calcein filters. Scalebar: 10  $\mu$ m.
